# Supplementary material
Source: ML conference proceedings conference paper supplement (https://openreview.net/forum?id=UiVfVB87Bs)
Supplement: supplementary_material [file attachment]

---

# A Generalized Bayesian Approach to Distribution-on-Distribution Regression (Supplementary Material)

---

## A PROOFS

### A.1 PROOF OF THEOREM 1

We first state a lemma which is a direct implication of Lemma 3.6 of Ghodrati and Panaretos [2022]. For  $\boldsymbol{\eta} \in \mathbb{R}^{K+1}$ , we define

$$T_{\boldsymbol{\eta}}(x) := \sum_{k=0}^M \eta_k G_{B(k, K-1+k)}(x).$$

Note that we have extended the definition of the map  $T_{\boldsymbol{\eta}}$  from  $\Theta$  to  $\mathbb{R}^{K+1}$ .

**Lemma 1.** *For  $\epsilon > 0$ , we have the following expansion of the expected risk around  $\boldsymbol{\theta}_1$ :*

$$R(\boldsymbol{\theta}_1 + \epsilon \boldsymbol{\eta}) = R(\boldsymbol{\theta}_1) + \epsilon D_{\boldsymbol{\eta}} R(\boldsymbol{\theta}_1) + \frac{\epsilon^2}{2} \|T_{\boldsymbol{\eta}}\|_{L^2(Q)}^2$$

where

$$D_{\boldsymbol{\eta}} R(\boldsymbol{\theta}_1) = \int_{\mathcal{W}_2(\Omega) \times \mathcal{W}_2(\Omega)} \int_0^1 (T_{\boldsymbol{\theta}}(F_{\mu}^{-1}(p)) - F_{\nu}^{-1}(p)) T_{\boldsymbol{\eta}}(F_{\mu}^{-1}(p)) dp dP(\mu, \nu)$$

is the directional derivative of  $R(\boldsymbol{\theta}_1)$  in the direction of  $\boldsymbol{\eta}$ .

*Proof of Theorem 1.* We apply Theorem 3.2 of Syring and Martin [2023] to derive the stated contraction rate.

We need to show that the loss function  $\ell_{\boldsymbol{\theta}}$  satisfies the sub-exponential condition:

There exists an interval  $(0, \bar{\omega})$  and constant  $K > 0$  such that for all  $\omega \in (0, \bar{\omega})$  and for all sufficiently small  $\delta > 0$ , for  $\boldsymbol{\theta} \in \Theta$ ,

$$\|T_{\boldsymbol{\theta}} - T_{\boldsymbol{\theta}_0}\|_{L^2(Q)} > \delta \implies P e^{-\omega(\ell_{\boldsymbol{\theta}} - \ell_{\boldsymbol{\theta}_0})} < e^{-K\omega\delta^2}. \quad (1)$$

We also need to show that the prior  $\Pi$  puts sufficient amount of mass on “neighborhood”  $G_n$  of the true parameter  $\boldsymbol{\theta}_0$ :

$$\log \Pi(G_n) \gtrsim -n\epsilon_n^2, \quad (2)$$

where  $G_n$  is defined as

$$G_n := \{\boldsymbol{\theta} \in \Theta : u(\boldsymbol{\theta}, \boldsymbol{\theta}_0) \leq \epsilon_n^2, v(\boldsymbol{\theta}, \boldsymbol{\theta}_0) \leq \epsilon_n^2\}, \quad n = 1, 2, \dots,$$

and  $u(\boldsymbol{\theta}, \boldsymbol{\theta}_0)$  and  $v(\boldsymbol{\theta}, \boldsymbol{\theta}_0)$  are the mean and variance of excess risk:

$$u(\boldsymbol{\theta}, \boldsymbol{\theta}_0) := \frac{1}{2} P(d_{\mathcal{W}}^2(T_{\boldsymbol{\theta}} \# \mu, \nu) - d_{\mathcal{W}}^2(T_{\boldsymbol{\theta}_0} \# \mu, \nu)) = R(\boldsymbol{\theta}) - R(\boldsymbol{\theta}_0),$$

and

$$v(\boldsymbol{\theta}, \boldsymbol{\theta}_0) := P \left( \left( \frac{1}{2} d_{\mathcal{W}}^2(T_{\boldsymbol{\theta}} \# \mu, \nu) - \frac{1}{2} d_{\mathcal{W}}^2(T_{\boldsymbol{\theta}_0} \# \mu, \nu) \right)^2 \right) - u(\boldsymbol{\theta}, \boldsymbol{\theta}_0)^2.$$

We first show that the sub-exponential condition (1) is satisfied. By compactness of  $\Omega$ , we have that for all  $\boldsymbol{\theta} \in \Theta$  and all  $(\mu, \nu)$  in the support of  $P$ ,

$$\ell_{\boldsymbol{\theta}}(\mu, \nu) - \ell_{\boldsymbol{\theta}_0}(\mu, \nu) < C,$$

for some constant  $C > 0$ . Thus, by Section 3.4.1 of Syring and Martin [2023],

$$P e^{-\omega(\ell_{\boldsymbol{\theta}} - \ell_{\boldsymbol{\theta}_0})} \leq \exp(-\omega u(\boldsymbol{\theta}, \boldsymbol{\theta}_0) + C \omega^3 v(\boldsymbol{\theta}, \boldsymbol{\theta}_0)),$$

for  $\omega$  small enough.

Now, consider  $\boldsymbol{\theta}_1, \boldsymbol{\theta}_2 \in \Theta$ , and let  $\boldsymbol{\eta} = \boldsymbol{\theta}_2 - \boldsymbol{\theta}_1$ . By Lemma 1, we have

$$R(\boldsymbol{\theta}_1 + \epsilon \boldsymbol{\eta}) = R(\boldsymbol{\theta}_1) + \epsilon D_{\boldsymbol{\eta}} R(\boldsymbol{\theta}_1) + \frac{\epsilon^2}{2} \|T_{\boldsymbol{\eta}}\|_{L^2(Q)}^2$$

where  $D_{\boldsymbol{\eta}} R(\boldsymbol{\theta}_1)$  is the directional derivative of  $R(\boldsymbol{\theta}_1)$  in the direction of  $\boldsymbol{\eta}$ .

For any  $\boldsymbol{\theta} \in \Theta$ , let  $\boldsymbol{\eta} = \boldsymbol{\theta} - \boldsymbol{\theta}_0$ , applying the expansion above with  $\epsilon = 1$ , we have

$$R(\boldsymbol{\theta}) - R(\boldsymbol{\theta}_0) = D_{\boldsymbol{\eta}} R(\boldsymbol{\theta}_0) + \frac{1}{2} \|T_{\boldsymbol{\eta}}\|_{L^2(Q)}^2.$$

Since  $\boldsymbol{\theta}_0$  is the minimizer of  $R$ , we have  $D_{\boldsymbol{\eta}} R(\boldsymbol{\theta}_0) = 0$ , and thus

$$u(\boldsymbol{\theta}, \boldsymbol{\theta}_0) = R(\boldsymbol{\theta}) - R(\boldsymbol{\theta}_0) = \frac{1}{2} \|T_{\boldsymbol{\eta}}\|_{L^2(Q)}^2 = \frac{1}{2} \|T_{\boldsymbol{\theta}} - T_{\boldsymbol{\theta}_0}\|_{L^2(Q)}^2. \quad (3)$$

We also have that

$$\begin{aligned} |d_{\mathcal{W}}^2(T_{\boldsymbol{\theta}_1} \# \mu, \nu) - d_{\mathcal{W}}^2(T_{\boldsymbol{\theta}_2} \# \mu, \nu)| &\lesssim |d_{\mathcal{W}}(T_{\boldsymbol{\theta}_1} \# \mu, \nu) - d_{\mathcal{W}}(T_{\boldsymbol{\theta}_2} \# \mu, \nu)| \\ &\leq d_{\mathcal{W}}(T_{\boldsymbol{\theta}_1} \# \mu, T_{\boldsymbol{\theta}_2} \# \mu) \\ &= \|T_{\boldsymbol{\theta}_1} - T_{\boldsymbol{\theta}_2}\|_{L^2(\mu)} \\ &\lesssim \|T_{\boldsymbol{\theta}_1} - T_{\boldsymbol{\theta}_2}\|_{L^2(Q)}. \end{aligned}$$

where the second inequality follows from triangle inequality, and the equality follows from that  $\mathcal{W}_2(\Omega)$  is flat. Therefore, it follows that

$$v(\boldsymbol{\theta}, \boldsymbol{\theta}_0) \lesssim \|T_{\boldsymbol{\theta}} - T_{\boldsymbol{\theta}_0}\|_{L^2(Q)}^2 \lesssim u(\boldsymbol{\theta}, \boldsymbol{\theta}_0). \quad (4)$$

Combining (3) and (4), We obtain

$$\begin{aligned} P e^{-\omega(\ell_{\boldsymbol{\theta}} - \ell_{\boldsymbol{\theta}_0})} &\leq \exp(-C_1 \omega u(\boldsymbol{\theta}, \boldsymbol{\theta}_0)) \\ &= \exp\left(-\frac{1}{2} C_1 \omega \|T_{\boldsymbol{\theta}} - T_{\boldsymbol{\theta}_0}\|_{L^2(Q)}^2\right) \end{aligned}$$

for some constant  $C_1 > 0$ . It follows that  $\|T_{\boldsymbol{\theta}} - T_{\boldsymbol{\theta}_0}\|_{L^2(Q)} > \delta$  implies that

$$P e^{-\omega(\ell_{\boldsymbol{\theta}} - \ell_{\boldsymbol{\theta}_0})} \leq \exp\left(-\frac{1}{2} C_1 \omega \delta^2\right),$$

and Condition (1) is verified.

We now verify the prior mass condition (2). We note that our prior specification satisfies

$$\Pi(\{\|\boldsymbol{\theta} - \boldsymbol{\theta}_0\|_2 \leq \delta\}) \gtrsim \delta^{K+1},$$

where  $\|\cdot\|_2$  is the 2-norm on  $\mathbb{R}^{K+1}$ . Since  $\|\boldsymbol{\theta} - \boldsymbol{\theta}_0\|_2 \leq \delta$  implies  $\|T_{\boldsymbol{\theta}} - T_{\boldsymbol{\theta}_0}\|_{L^2(Q)} \lesssim \delta$ , it follows that

$$\Pi(\{\|T_{\boldsymbol{\theta}} - T_{\boldsymbol{\theta}_0}\|_{L^2(Q)} \leq \delta\}) \gtrsim \delta^{K+1}.$$

Since  $\|T_{\boldsymbol{\theta}} - T_{\boldsymbol{\theta}_0}\|_{L^2(Q)} \leq \delta$  implies  $\{u(\boldsymbol{\theta}, \boldsymbol{\theta}_0) \lesssim \delta^2, v(\boldsymbol{\theta}, \boldsymbol{\theta}_0) \lesssim \delta^2\}$ , we have

$$\Pi(G_n) \gtrsim \Pi(\{\boldsymbol{\theta} : \|T_{\boldsymbol{\theta}} - T_{\boldsymbol{\theta}_0}\|_{L^2(Q)} \leq \epsilon_n\}) \gtrsim \epsilon_n^{K+1}.$$

Therefore, with  $\epsilon_n = n^{-1/2}(\log n)^{1/2}$ , we have

$$\log \Pi(G_n) \gtrsim -\log n \gtrsim -n\epsilon_n^2.$$

Thus, the prior mass condition is satisfied, and the proof is completed.  $\square$

## A.2 PROOF OF THEOREM 2

For each  $m = 1, 2, \dots$ , we define

$$\tilde{R}^m(\boldsymbol{\theta}) := \frac{1}{2} \int_{\mathcal{W}_2(\Omega) \times \mathcal{W}_2(\Omega)} d_{\mathcal{W}}^2(T_{\boldsymbol{\theta}} \# \hat{\mu}^m, \hat{\nu}^m) dP(\mu, \nu). \quad (5)$$

Also define the mean and variance of excess risk as

$$u_m(\boldsymbol{\theta}, \boldsymbol{\theta}_0) := \frac{1}{2} P(d_{\mathcal{W}}^2(T_{\boldsymbol{\theta}} \# \hat{\mu}^m, \hat{\nu}^m) - d_{\mathcal{W}}^2(T_{\boldsymbol{\theta}_0} \# \hat{\mu}^m, \hat{\nu}^m)) = \tilde{R}^m(\boldsymbol{\theta}) - \tilde{R}^m(\boldsymbol{\theta}_0),$$

and

$$v_m(\boldsymbol{\theta}, \boldsymbol{\theta}_0) := P\left(\left(\frac{1}{2} d_{\mathcal{W}}^2(T_{\boldsymbol{\theta}} \# \hat{\mu}^m, \hat{\nu}^m) - \frac{1}{2} d_{\mathcal{W}}^2(T_{\boldsymbol{\theta}_0} \# \hat{\mu}^m, \hat{\nu}^m)\right)^2\right) - u_m(\boldsymbol{\theta}, \boldsymbol{\theta}_0)^2.$$

We first prove the following lemma bounding  $u_m(\boldsymbol{\theta}, \boldsymbol{\theta}_0)$  and  $v_m(\boldsymbol{\theta}, \boldsymbol{\theta}_0)$  in terms of  $\|T_{\boldsymbol{\theta}} - T_{\boldsymbol{\theta}_0}\|_{L^2(Q)}^2$  and  $r_m^{-1}$ .

**Lemma 2.**

$$\begin{aligned} \|T_{\boldsymbol{\theta}} - T_{\boldsymbol{\theta}_0}\|_{L^2(Q)}^2 - r_m^{-1} &\lesssim u_m(\boldsymbol{\theta}, \boldsymbol{\theta}_0) \lesssim \|T_{\boldsymbol{\theta}} - T_{\boldsymbol{\theta}_0}\|_{L^2(Q)}^2 + r_m^{-1}, \\ v_m(\boldsymbol{\theta}, \boldsymbol{\theta}_0) &\lesssim \|T_{\boldsymbol{\theta}} - T_{\boldsymbol{\theta}_0}\|_{L^2(Q)}^2 + r_m^{-2}. \end{aligned}$$

*Proof.* We first have the following decomposition of  $u_m(\boldsymbol{\theta}, \boldsymbol{\theta}_0)$ :

$$\tilde{R}^m(\boldsymbol{\theta}) - \tilde{R}^m(\boldsymbol{\theta}_0) = \underbrace{\tilde{R}^m(\boldsymbol{\theta}) - R(\boldsymbol{\theta})}_{\text{Term 1}} + \underbrace{R(\boldsymbol{\theta}) - R(\boldsymbol{\theta}_0)}_{\text{Term 2}} + \underbrace{R(\boldsymbol{\theta}_0) - \tilde{R}^m(\boldsymbol{\theta}_0)}_{\text{Term 3}}. \quad (6)$$

We bound each of the three terms on the RHS of (6).

$$\begin{aligned} \tilde{R}^m(\boldsymbol{\theta}) - R(\boldsymbol{\theta}) &= P\left(d_{\mathcal{W}}^2(T_{\boldsymbol{\theta}} \# \hat{\mu}^m, \hat{\nu}^m) - d_{\mathcal{W}}^2(T_{\boldsymbol{\theta}} \# \mu, \nu)\right) \\ &= P\left(d_{\mathcal{W}}^2(T_{\boldsymbol{\theta}} \# \hat{\mu}^m, \hat{\nu}^m) - d_{\mathcal{W}}^2(T_{\boldsymbol{\theta}} \# \hat{\mu}^m, \nu) + d_{\mathcal{W}}^2(T_{\boldsymbol{\theta}} \# \hat{\mu}^m, \nu) - d_{\mathcal{W}}^2(T_{\boldsymbol{\theta}} \# \mu, \nu)\right). \end{aligned}$$

We have that

$$\begin{aligned} &P\left(d_{\mathcal{W}}^2(T_{\boldsymbol{\theta}} \# \hat{\mu}^m, \hat{\nu}^m) - d_{\mathcal{W}}^2(T_{\boldsymbol{\theta}} \# \hat{\mu}^m, \nu)\right) \\ &= P\left((d_{\mathcal{W}}(T_{\boldsymbol{\theta}} \# \hat{\mu}^m, \hat{\nu}^m) - d_{\mathcal{W}}(T_{\boldsymbol{\theta}} \# \hat{\mu}^m, \nu))(d_{\mathcal{W}}(T_{\boldsymbol{\theta}} \# \hat{\mu}^m, \hat{\nu}^m) + d_{\mathcal{W}}(T_{\boldsymbol{\theta}} \# \hat{\mu}^m, \nu))\right) \\ &\geq P(-d_{\mathcal{W}}(\hat{\nu}^m, \nu)(d_{\mathcal{W}}(T_{\boldsymbol{\theta}} \# \hat{\mu}^m, \hat{\nu}^m) + d_{\mathcal{W}}(T_{\boldsymbol{\theta}} \# \hat{\mu}^m, \nu))) \\ &\gtrsim P(-d_{\mathcal{W}}(\hat{\nu}^m, \nu)) \\ &\gtrsim -r_m^{-1}, \end{aligned}$$

where the first inequality follows from the reverse triangle inequality, and the last inequality follows from our assumption. We also have that

$$\begin{aligned}
& P\left(d_{\mathcal{W}}^2(T_{\boldsymbol{\theta}}\#\hat{\mu}^m, \hat{\nu}^m) - d_{\mathcal{W}}^2(T_{\boldsymbol{\theta}}\#\hat{\mu}^m, \nu)\right) \\
&= P\left((d_{\mathcal{W}}(T_{\boldsymbol{\theta}}\#\hat{\mu}^m, \hat{\nu}^m) - d_{\mathcal{W}}(T_{\boldsymbol{\theta}}\#\hat{\mu}^m, \nu))(d_{\mathcal{W}}(T_{\boldsymbol{\theta}}\#\hat{\mu}^m, \hat{\nu}^m) + d_{\mathcal{W}}(T_{\boldsymbol{\theta}}\#\hat{\mu}^m, \nu))\right) \\
&\leq P\left(d_{\mathcal{W}}(\hat{\nu}^m, \nu)(d_{\mathcal{W}}(T_{\boldsymbol{\theta}}\#\hat{\mu}^m, \hat{\nu}^m) + d_{\mathcal{W}}(T_{\boldsymbol{\theta}}\#\hat{\mu}^m, \nu))\right) \\
&\lesssim r_m^{-1}
\end{aligned}$$

by an application of the triangle inequality.

Similarly, we can show that

$$-r_m^{-1} \lesssim P\left(d_{\mathcal{W}}^2(T_{\boldsymbol{\theta}}\#\hat{\mu}^m, \nu) - d_{\mathcal{W}}^2(T_{\boldsymbol{\theta}}\#\mu, \nu)\right) \lesssim r_m^{-1}.$$

It follows that the first term on the RHS of (6) can be bounded as

$$-r_m^{-1} \lesssim \tilde{R}^m(\boldsymbol{\theta}) - R(\boldsymbol{\theta}) \lesssim r_m^{-1}.$$

Using the same calculation, we also have the bound for the third term on the RHS of (6):

$$-r_m^{-1} \lesssim R(\boldsymbol{\theta}_0) - \tilde{R}^m(\boldsymbol{\theta}_0) \lesssim r_m^{-1}.$$

For the second term on the RHS of (6), we recall from the proof of Theorem 1 that

$$R(\boldsymbol{\theta}) - R(\boldsymbol{\theta}_0) = \frac{1}{2} \|T_{\boldsymbol{\theta}} - T_{\boldsymbol{\theta}_0}\|_{L^2(Q)}^2.$$

Thus, we obtain the following bound for  $u_m(\boldsymbol{\theta}, \boldsymbol{\theta}_0)$ :

$$\|T_{\boldsymbol{\theta}} - T_{\boldsymbol{\theta}_0}\|_{L^2(Q)}^2 - r_m^{-1} \lesssim u_m(\boldsymbol{\theta}, \boldsymbol{\theta}_0) \lesssim \|T_{\boldsymbol{\theta}} - T_{\boldsymbol{\theta}_0}\|_{L^2(Q)}^2 + r_m^{-1}.$$

Now we try to obtain the upper bound for  $v_m(\boldsymbol{\theta}, \boldsymbol{\theta}_0)$ . By triangle inequality,

$$\begin{aligned}
& |d_{\mathcal{W}}(T_{\boldsymbol{\theta}}\#\hat{\mu}^m, \hat{\nu}^m) - d_{\mathcal{W}}(T_{\boldsymbol{\theta}_0}\#\hat{\mu}^m, \hat{\nu}^m)| \\
&\leq |d_{\mathcal{W}}(T_{\boldsymbol{\theta}}\#\hat{\mu}^m, \hat{\nu}^m) - d_{\mathcal{W}}(T_{\boldsymbol{\theta}}\#\mu, \nu)| + |d_{\mathcal{W}}(T_{\boldsymbol{\theta}}\#\mu, \nu) - d_{\mathcal{W}}(T_{\boldsymbol{\theta}_0}\#\mu, \nu)| \\
&\quad + |d_{\mathcal{W}}(T_{\boldsymbol{\theta}_0}\#\mu, \nu) - d_{\mathcal{W}}(T_{\boldsymbol{\theta}_0}\#\hat{\mu}^m, \hat{\nu}^m)|
\end{aligned}$$

Similar calculations as above lead to

$$|d_{\mathcal{W}}(T_{\boldsymbol{\theta}}\#\hat{\mu}^m, \hat{\nu}^m) - d_{\mathcal{W}}(T_{\boldsymbol{\theta}}\#\mu, \nu)| \lesssim r_m^{-1}$$

and

$$|d_{\mathcal{W}}(T_{\boldsymbol{\theta}_0}\#\mu, \nu) - d_{\mathcal{W}}(T_{\boldsymbol{\theta}_0}\#\hat{\mu}^m, \hat{\nu}^m)| \lesssim r_m^{-1}.$$

We also have that

$$\begin{aligned}
|d_{\mathcal{W}}(T_{\boldsymbol{\theta}}\#\mu, \nu) - d_{\mathcal{W}}(T_{\boldsymbol{\theta}_0}\#\mu, \nu)| &\leq d_{\mathcal{W}}(T_{\boldsymbol{\theta}}\#\mu, T_{\boldsymbol{\theta}_0}\#\mu) \\
&= \|T_{\boldsymbol{\theta}} - T_{\boldsymbol{\theta}_0}\|_{L^2(\mu)} \\
&\lesssim \|T_{\boldsymbol{\theta}} - T_{\boldsymbol{\theta}_0}\|_{L^2(Q)}.
\end{aligned}$$

Since

$$v_m(\boldsymbol{\theta}, \boldsymbol{\theta}_0) \lesssim P(|d_{\mathcal{W}}(T_{\boldsymbol{\theta}}\#\hat{\mu}^m, \hat{\nu}^m) - d_{\mathcal{W}}(T_{\boldsymbol{\theta}_0}\#\hat{\mu}^m, \hat{\nu}^m)|^2),$$

it follows that

$$v_m(\boldsymbol{\theta}, \boldsymbol{\theta}_0) \lesssim \|T_{\boldsymbol{\theta}} - T_{\boldsymbol{\theta}_0}\|_{L^2(Q)}^2 + r_m^{-2}.$$

□

We are now in a position to prove Theorem 2.

*Proof of Theorem 2.* Let  $A_n := \{\boldsymbol{\theta} \in \Theta : \|T_{\boldsymbol{\theta}} - T_{\boldsymbol{\theta}_0}\|_{L^2(Q)} > M\epsilon_n\}$ . The Gibbs posterior probability of  $A_n$  is given by

$$\begin{aligned}\Pi_n(A_n) &= \frac{N_n^m(A_n)}{D_n^m} \\ &= \frac{\int_{A_n} \exp(-\omega n(\tilde{R}_n^m(\boldsymbol{\theta}) - \tilde{R}_n^m(\boldsymbol{\theta}_0))) \Pi(d\boldsymbol{\theta})}{\int_{\Theta} \exp(-\omega n(\tilde{R}_n^m(\boldsymbol{\theta}) - \tilde{R}_n^m(\boldsymbol{\theta}_0))) \Pi(d\boldsymbol{\theta})}.\end{aligned}$$

Note that  $m(n)$  is assumed to be a deterministic function of  $n$ . We aim to show that  $P^n \Pi_n(A_n) \rightarrow 0$  as  $n \rightarrow \infty$ . We define the set

$$G_n^m := \{\boldsymbol{\theta} \in \Theta : u_m(\boldsymbol{\theta}, \boldsymbol{\theta}_0) \leq \epsilon_n^2, v_m(\boldsymbol{\theta}, \boldsymbol{\theta}_0) \leq \epsilon_n^2\}.$$

By Lemma 2 and the assumption  $\epsilon_n^2 > r_m^{-1}$ ,  $G_n^m$  is implied by the event

$$H_n^m := \{\boldsymbol{\theta} \in \Theta : \|T_{\boldsymbol{\theta}} - T_{\boldsymbol{\theta}_0}\|_{L^2(Q)}^2 \leq c(\epsilon_n^2 - r_m^{-1})\},$$

for some constant  $c > 0$ . We thus have

$$\Pi(G_n^m) \geq \Pi(H_n^m) \gtrsim \epsilon_n^{K+1},$$

from which it follows that

$$\log \Pi(G_n^m) \gtrsim -n\epsilon_n^2.$$

Since the excess loss

$$\ell_{\boldsymbol{\theta}}(\hat{\mu}^m, \hat{\nu}^m) - \ell_{\boldsymbol{\theta}_0}(\hat{\mu}^m, \hat{\nu}^m)$$

is bounded for all  $\boldsymbol{\theta}$  and  $(\hat{\mu}^m, \hat{\nu}^m)$ , when

$$\|T_{\boldsymbol{\theta}} - T_{\boldsymbol{\theta}_0}\|_{L^2(Q)}^2 > \epsilon_n,$$

we apply Section 3.4.1 of Syring and Martin [2023] to obtain

$$\begin{aligned}P e^{-n\omega(\tilde{R}_n^m(\boldsymbol{\theta}) - \tilde{R}_n^m(\boldsymbol{\theta}_0))} &\leq \exp\left(-nc_0\omega\left(\|T_{\boldsymbol{\theta}} - T_{\boldsymbol{\theta}_0}\|_{L^2(Q)}^2 - r_{m(n)}^{-1} - r_{m(n)}^{-2}\right)\right) \\ &\leq \exp\left(-nc_1\omega(\epsilon_n^2 - r_m^{-1})\right) \\ &\leq \exp\left(-nc_2\omega\epsilon_n^2\right)\end{aligned}$$

for some constants  $c_0, c_1, c_2 > 0$ . By Fubini's Theorem, we have

$$P^n N_n(A_n) = \int_{A_n} P e^{-\omega n(\tilde{R}_n^m(\boldsymbol{\theta}) - \tilde{R}_n^m(\boldsymbol{\theta}_0))} \Pi(d\boldsymbol{\theta}) \leq \exp\left(-nc_2\omega M^2 \epsilon_n^2\right).$$

Following essentially the same lines as the proof of Lemma 1 of Syring and Martin [2023], we obtain

$$P^n\left(D_n^m > \frac{1}{2}\Pi(G_n^m)e^{-2\omega n\epsilon_n^2}\right) \rightarrow 1,$$

as  $n \rightarrow \infty$ .

Let  $b_n^m = \frac{1}{2}\Pi(G_n^m)e^{-2\omega n\epsilon_n^2}$ , we have

$$P^n(D_n^m \leq b_n^m) \rightarrow 0$$

as  $n \rightarrow \infty$ . Since

$$\begin{aligned}\Pi_n(A_n) &\leq \frac{N_n^m(A_n)}{D_n^m} 1(D_n^m > b_n^m) + 1(D_n^m \leq b_n^m) \\ &\leq b_n^{-1} N_n^m(A_n) + 1(D_n^m \leq b_n^m)\end{aligned}$$

It follows that

$$P^n \Pi_n(A_n) \rightarrow 0$$

as  $n \rightarrow \infty$ . The proof is completed.  $\square$

## B ADDITIONAL SIMULATION STUDIES

In order to evaluate the robustness of our proposed model and posterior sampling strategy, we conduct additional simulation studies aimed at investigating its behavior under mis-specification. Specifically, we replicate the simulation settings described in the main article, wherein the true optimal transport map is generated using BP basis functions with a polynomial order of  $K = 50$ . However, in the model fitting process, we set the polynomial order to  $K = 20$ . The outcomes of these experiments are illustrated in Figures 1, 2, and 3.

Upon examination of the results, we observe that despite the mis-specification in the model fitting, the true optimal transport maps are successfully recovered in all scenarios. This suggests that our proposed model and posterior sampling strategy exhibit robustness to mis-specification, demonstrating their effectiveness in capturing underlying patterns even when the model assumptions are not entirely met.

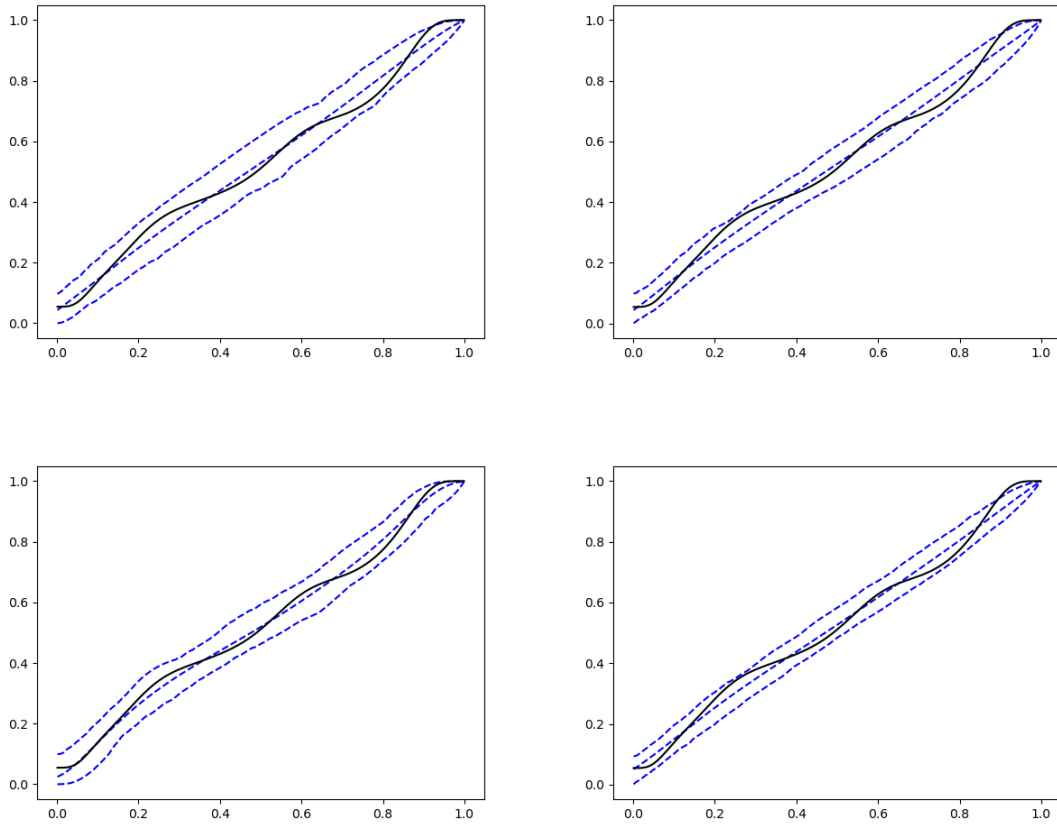

Figure 1: Simulation 1. Top left:  $n=5$  ( $\omega = 500$ ). Top right:  $n=20$  ( $\omega = 200$ ). Bottom left:  $n=50$  ( $\omega = 100$ ). Bottom right:  $n=100$  ( $\omega = 50$ ). Black curve: True optimal transport map. Blue dashed curves: estimated posterior mean and posterior credible intervals of optimal transport map.

## References

- Laya Ghodrati and Victor M Panaretos. Distribution-on-distribution regression via optimal transport maps. *Biometrika*, 109(4):957–974, 01 2022.
- Nicholas Syring and Ryan Martin. Gibbs posterior concentration rates under sub-exponential type losses. *Bernoulli*, 29(2): 1080 – 1108, 2023.

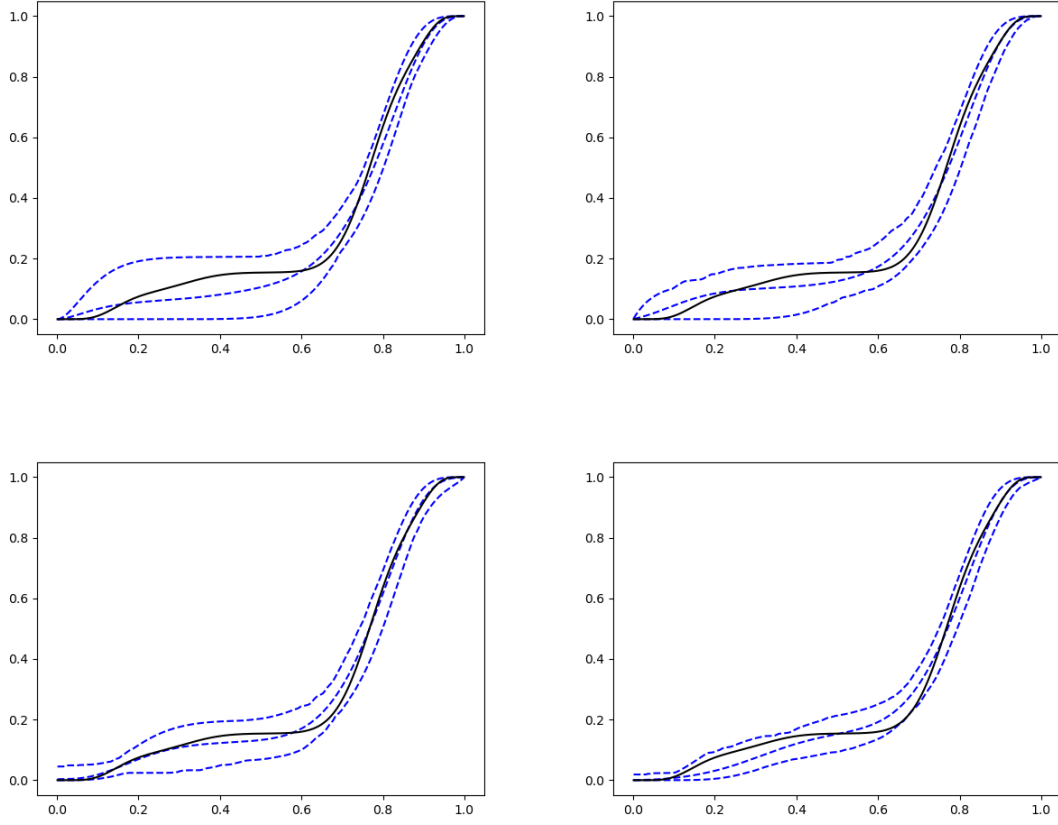

Figure 2: Simulation 2. Top left:  $n=5$  ( $\omega = 500$ ). Top right:  $n=20$  ( $\omega = 200$ ). Bottom left:  $n=50$  ( $\omega = 100$ ). Bottom right:  $n=100$  ( $\omega = 50$ ). Black curve: True optimal transport map. Blue dashed curves: estimated posterior mean and posterior credible intervals of optimal transport map.

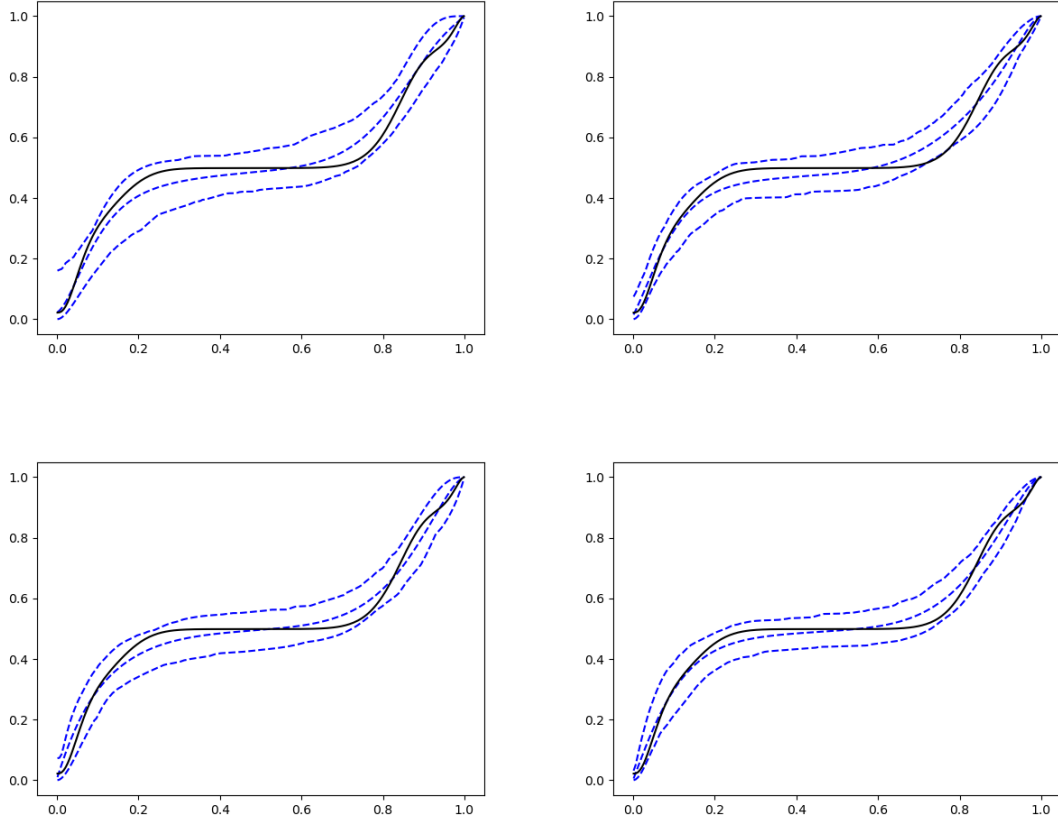

Figure 3: Simulation 3. Top left:  $n=5$  ( $\omega = 500$ ). Top right:  $n=20$  ( $\omega = 200$ ). Bottom left:  $n=50$  ( $\omega = 100$ ). Bottom right:  $n=100$  ( $\omega = 50$ ). Black curve: True optimal transport map. Blue dashed curves: estimated posterior mean and posterior credible intervals of optimal transport map.
